# Supplementary material
Source: PubMed Central journal article supplement (PMC5289833)
Supplement: 517FigureS1.pdf [file 517FigureS1.pdf]

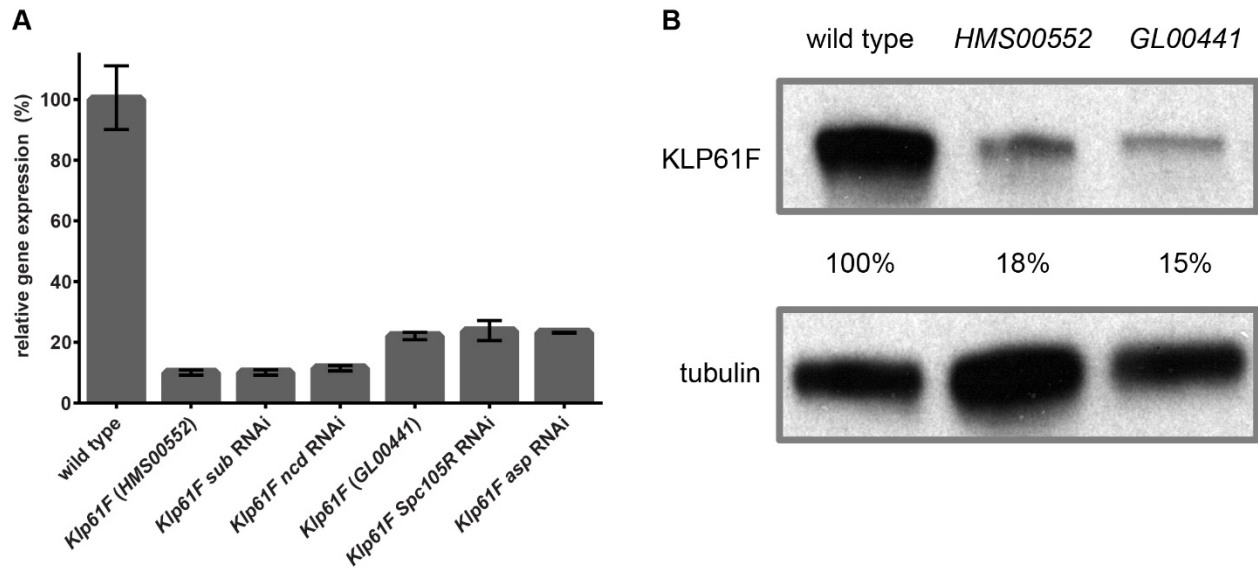

Fig. S1. **Quantification of *Klp61F* RNAi knockdown.** (A) Graph showing the relative gene expression of *Klp61F* in wild-type, single RNAi, and double RNAi oocytes, as measured by quantitative RT-PCR. (B) Western blot showing KLP61F protein levels in wild-type and single RNAi oocytes. Tubulin levels were used as a loading control. Numbers show quantification of relative band intensity using ImageJ.
